# Supplementary material
Source: Springer Nature journal article supplement (https://www.springermedizin.de/resource/supplementary/12889_2009_1830_MOESM2_ESM.pdf/9504136)
Supplement: MOESM2 [file 9504136]

*READY* psychosocial  
resilience program

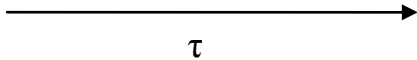

Changes in psychosocial  
well-being

$\alpha$

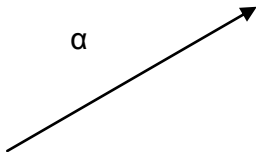

Changes in:  
positive emotions  
active coping  
cognitive flexibility  
social support  
life meaning

$\beta$

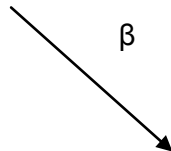

*READY* psychosocial  
resilience program

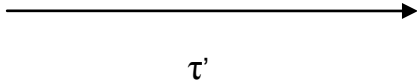

Changes in psychosocial  
well-being
